# Supplementary material for: External globus pallidus input to the dorsal striatum regulates habitual seeking behavior in male mice
Source: PubMed Central journal article supplement (PMC10338526; doi:10.1038/s41467-023-39545-8), 2023-07-12
Supplement: 41467_2023_39545_MOESM1_ESM.pdf [file 41467_2023_39545_MOESM1_ESM.pdf]

## **External globus pallidus input to the dorsal striatum regulates habitual seeking behavior in male mice**

Matthew Baker<sup>1,#</sup>, Seungwoo Kang<sup>1,2,#</sup>, Sa-Ik Hong<sup>1</sup>, Minryung Song<sup>3</sup>, Minsu Abel Yang<sup>3</sup>, Lee Peyton<sup>1</sup>, Hesham Essa<sup>1</sup>, Sang Wan Lee<sup>3,4</sup>, and Doo-Sup Choi<sup>1,5,6,\*</sup>

<sup>1</sup>Department of Molecular Pharmacology and Experimental Therapeutics, Mayo Clinic, Rochester, Minnesota 55905, USA. <sup>2</sup>Department of Pharmacology and Toxicology, Medical College of Georgia, Augusta University, Augusta, Georgia 30912, USA.

<sup>3</sup>Department of Brain and Cognitive Sciences, <sup>4</sup>Department of Bio and Brain Engineering, Korea Advanced Institute of Science and Technology (KAIST), Daejeon, 34141, Republic of Korea. <sup>5</sup>Department of Psychiatry and Psychology, <sup>6</sup>Neuroscience Program, Mayo Clinic College of Medicine and Science, Rochester, Minnesota 55905, USA.

#These authors contributed equally to this work.

\*Corresponding author: [choids@mayo.edu](mailto:choids@mayo.edu)

**Keywords:** external globus pallidus, arky pallidal neuron, goal-directed behavior, habit, reward-seeking behavior

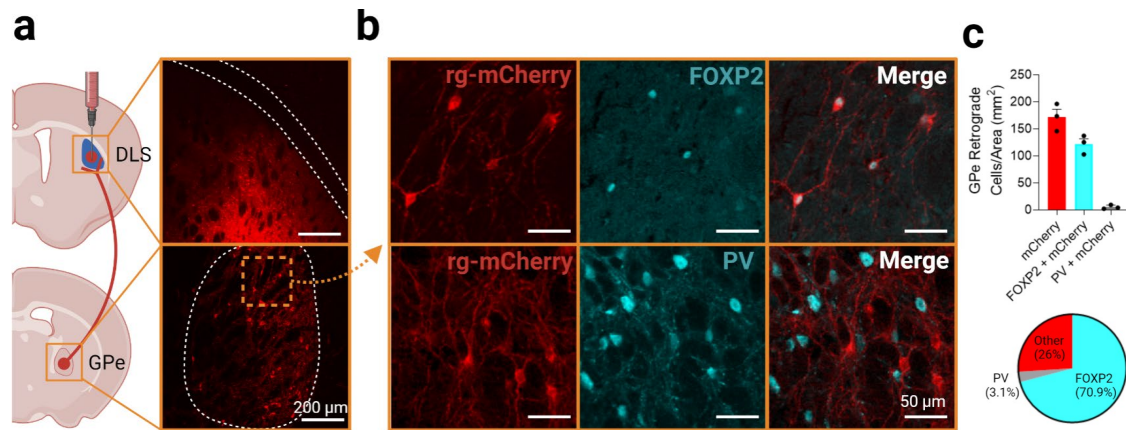

**Supplementary Figure 1. Cellular markers of dorsolateral striatum (DLS)-projecting external globus pallidus (GPe) arkypallidal neurons.** (a) Schematic of retrograde mCherry virus injection into the DLS and representative IHC images at the injection site and in the GPe. Scale: 200 μm. (b) representative IHC images of GPe arkypallidal cells and FOXP2 and PV cellular markers. Scale: 50 μm. (c) Quantification of overlap of retrograde mCherry with FOXP2 and PV cellular markers in the GPe.  $n = 3$  mice/group. Data represent mean  $\pm$  SEM. Source data are provided as a Source Data file. Supplementary Figure 1a was created with BioRender.com.

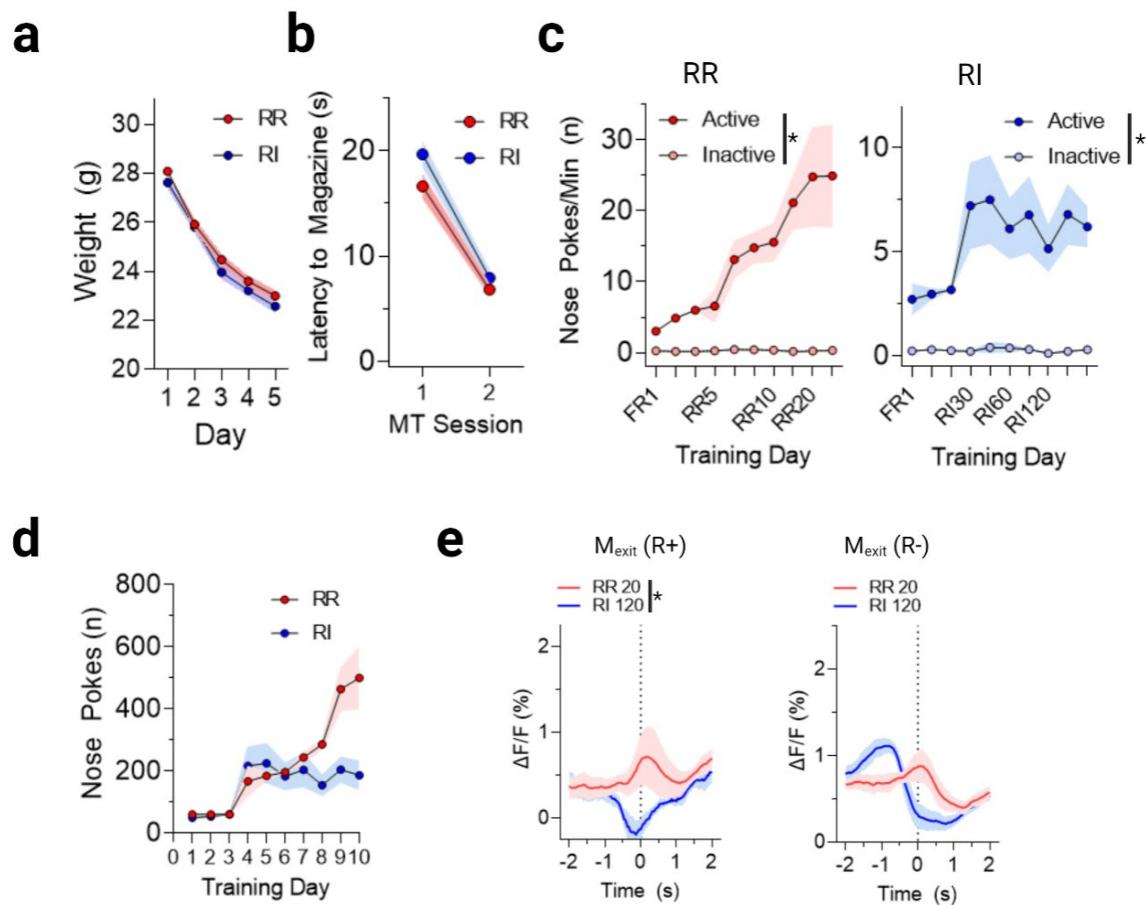

**Supplementary Figure 2. External globus pallidus (GPe) arkyvallidal Ca<sup>2+</sup> imaging training. (a)** Average weight of mice undergoing food restriction prior to operant conditioning. **(b)** Latency to magazine decreased across training sessions.  $F_{(1,16)} = 142.9$ ,  $p < 0.0001$  for time,  $F_{(1,16)} = 5.34$ ,  $p < 0.04$  for group,  $F_{(1,16)} = 1.14$ ,  $p = 0.30$  for interaction.  $n = 5$  mice/group. **(c)** Nose poke rates increased over time in the active hole. For RR,  $F_{(1,80)} = 127.3$ ,  $p < 0.0001$  for nose poke,  $F_{(9,80)} = 4.99$ ,  $p < 0.0001$  for time,  $F_{(9,80)} = 4.93$ ,  $p < 0.0001$  for interaction. For RI,  $F_{(1,80)} = 142.1$ ,  $p < 0.0001$  for nose poke,  $F_{(9,80)} = 1.85$ ,  $p = 0.07$  for time,  $F_{(9,80)} = 1.77$ ,  $p = 0.09$  for interaction. **(d)** Total nosepokes for RR and RI groups across the training session. **(e)** Calcium signal for rewarded (R+) and unrewarded (R-) magazine exit. For the rewarded magazine exit [ $M_{\text{exit}} (R+)$ ],  $F_{(1,7)} = 6.66$ ,  $p = 0.036$  for group (RR vs RI),  $F_{(120,840)} = 0.85$ ,  $p = 0.87$  for time,  $F_{(120,840)} = 1.26$ ,  $p = 0.039$  for interaction. For the non-rewarded magazine exit [ $M_{\text{exit}} (R-)$ ],  $F_{(1,7)} = 0.20$ ,  $p = 0.67$  for group (RR vs RI),  $F_{(120,840)} = 8.65$ ,  $p < 0.0001$  for time,  $F_{(120,840)} = 5.51$ ,  $p < 0.0001$  for interaction. Two-way repeated measures ANOVA with Tukey's *posthoc* tests were used for **(b-e)**.  $n = 5$  (RR), 4 (RI). See supplementary Table 3 for specific significant time ranges. Data represent mean  $\pm$  SEM. \* $p < 0.05$ . See Supplementary Table 2 for full statistical information. Source data are provided as a Source Data file.

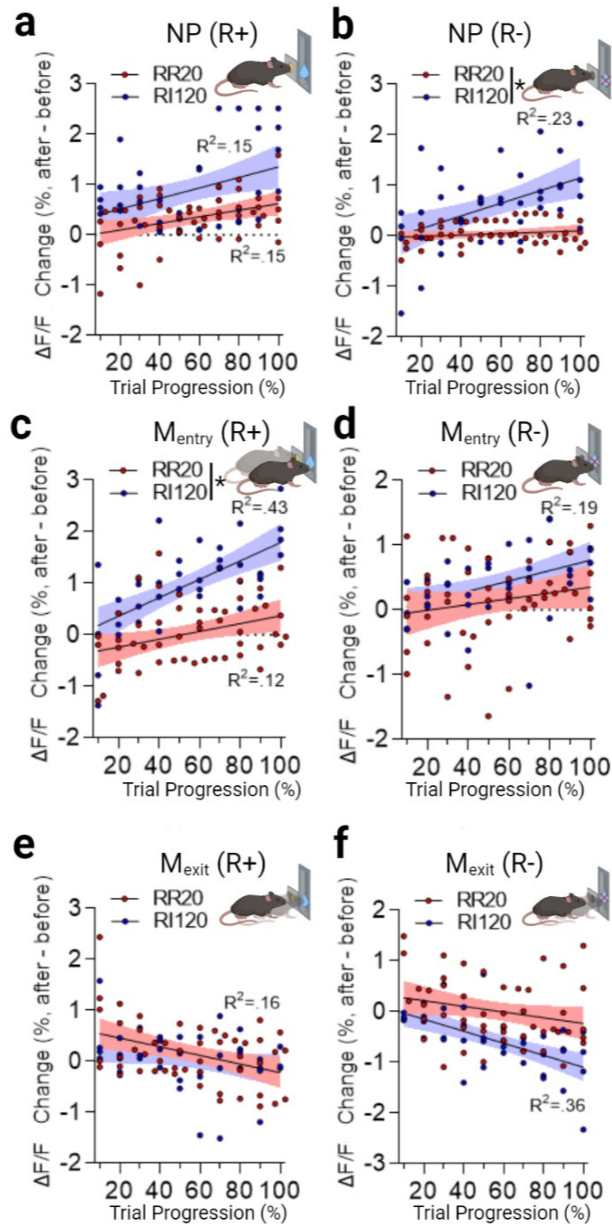

**Supplementary Figure 3. External globus pallidus (GPe) arkypallidal neuron  $\text{Ca}^{2+}$  signal changes across an operant session.**

For rewarded nose poke (a) unrewarded nose poke (b), simple linear regression models for the association between a change in GPe arkypallidal neuron  $\text{Ca}^{2+}$  signal (2 sec after – 2 sec before) and operant trial duration averaged into 10 blocks. For the rewarded nose poke (NP+),  $F_{(1,48)} = 8.26$ ,  $p = 0.006$  for RR,  $F_{(1,38)} = 6.78$ ,  $p = 0.013$  for RI,  $F_{(1,86)} = 0.79$ ,  $p = 0.38$  for RR versus RI. For the non-rewarded nose poke (NP-),  $F_{(1,48)} = 1.48$ ,  $p = 0.23$  for RR,  $F_{(1,38)} = 11.66$ ,  $p = 0.002$  for RI,  $F_{(1,86)} = 10.08$ ,  $p = 0.002$  for RR versus RI. Rewarded magazine entry (c) unrewarded magazine entry (d). For the rewarded magazine entry [ $M_{\text{entry}}$  (R+)],  $F_{(1,48)} = 6.62$ ,  $p = 0.013$  for RR,  $F_{(1,38)} = 28.86$ ,  $p < 0.0001$  for RI,  $F_{(1,86)} = 5.34$ ,  $p = 0.023$  for RR versus RI. For the non-rewarded magazine entry [ $M_{\text{entry}}$  (R-)],  $F_{(1,48)} = 1.96$ ,  $p = 0.17$  for RR,  $F_{(1,38)} = 9.08$ ,  $p = 0.005$  for RI,  $F_{(1,86)} = 0.69$ ,  $p = 0.41$  for RR versus RI. Rewarded magazine exit (e) and unrewarded magazine exit (f). For the rewarded magazine exit [ $M_{\text{exit}}$  (R+)],  $F_{(1,48)} = 9.08$ ,  $p = 0.004$  for RR,  $F_{(1,38)} = 3.12$ ,  $p = 0.09$  for RI,  $F_{(1,86)} = 0.60$ ,  $p = 0.44$  for RR versus RI. For the non-rewarded magazine exit [ $M_{\text{exit}}$  (R-)],  $F_{(1,48)} = 3.30$ ,  $p = 0.075$  for RR,  $F_{(1,38)} = 21.77$ ,  $p < 0.0001$  for RI,  $F_{(1,86)} = 2.99$ ,  $p = 0.13$  for RR versus RI. Linear regression tests were used for (a-f). Lines indicate regression line  $\pm$  95% CI.  $R^2$  value indicates a significant association between the change in  $\text{Ca}^{2+}$  signal and behavioral event progression across a trial. \* $p < 0.05$  for between-group slope comparisons. See Supplementary Table 2 for full statistical information. Source data are provided as a Source Data file. Supplementary Figure 3a-f were created with BioRender.com.

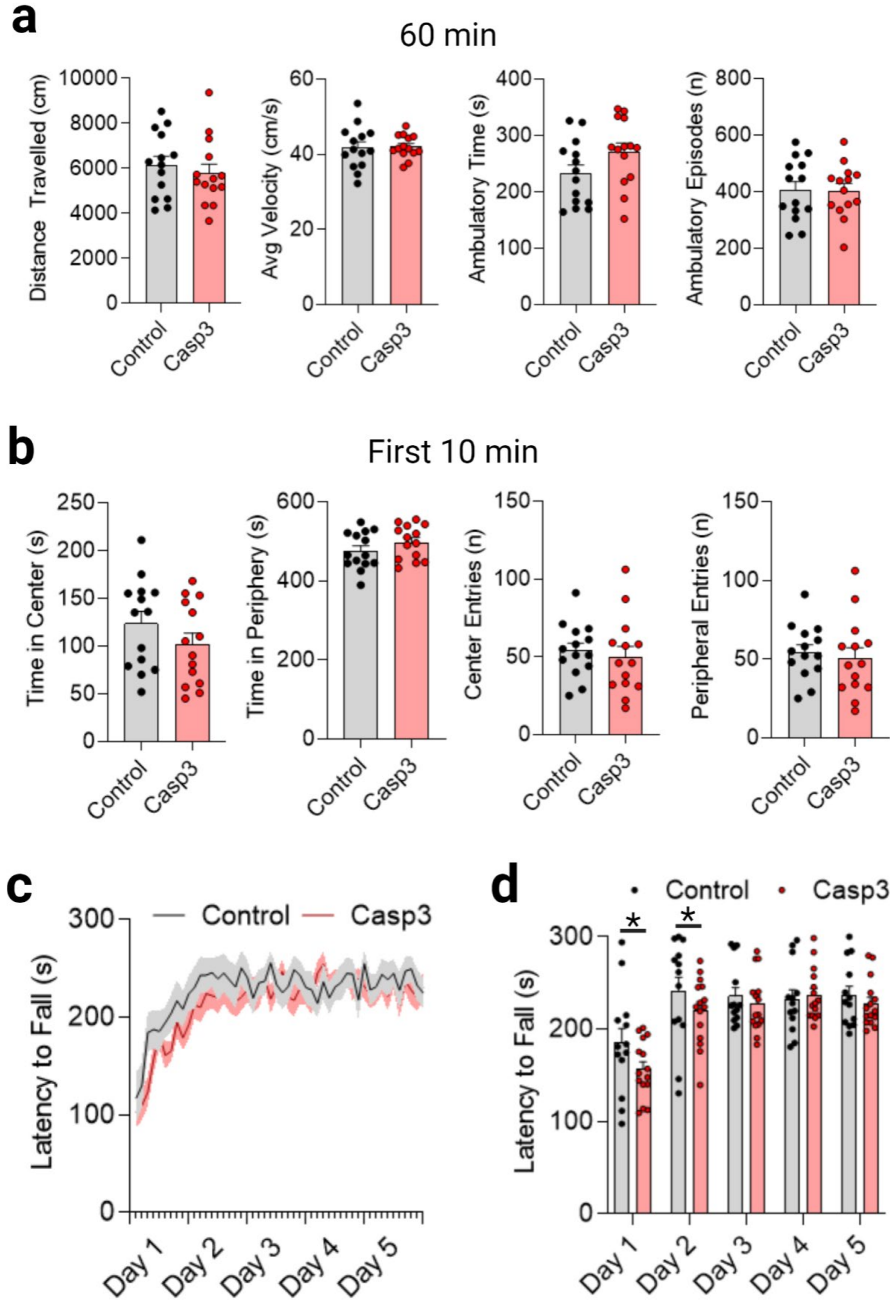

**Supplementary Figure 4. Effects of caspase-3 (casp3) ablation of external globus pallidus (GPe) arky pallidal neurons on spontaneous locomotion and motor skill acquisition. (a)** GPe arky pallidal neuron ablation did not alter distance traveled or average velocity in the open field test, **(b)** or anxiety-like behaviors during the first 10 minutes. **(c)** Latency to fall increased across training sessions for both groups.  $F_{(49,1274)} = 8.68$ ,  $p < 0.0001$  for time,  $F_{(1,26)} = 1.28$ ,  $p = 0.27$  for group (control vs casp3),  $F_{(49,1274)} = 0.76$ ,  $p = 0.89$  for interaction. **(d)** Caspase mice had a shorter latency to fall compared to control mice for days.  $F_{(4,130)} = 58.82$ ,  $p < 0.0001$  for time,  $F_{(1,130)} = 1.49$ ,  $p = 0.22$  for group (control vs casp3),  $F_{(4,130)} = 2.99$ ,  $p = 0.018$  for interaction. Sidak's *posthoc* tests show  $*p < 0.05$  in day 1 ( $p = 0.0005$ ) and day 2 ( $p = 0.018$ ). Two-tailed Mann-Whitney tests were used for **(a-b)**. Two-way repeated measures ANOVA with Sidak's *posthoc* tests were used for **(c-d)**.  $n = 14$  mice/group. Data represents mean  $\pm$  SEM.  $*p < 0.05$ . See Supplementary Table 2 for full statistical information. Source data are provided as a Source Data file.

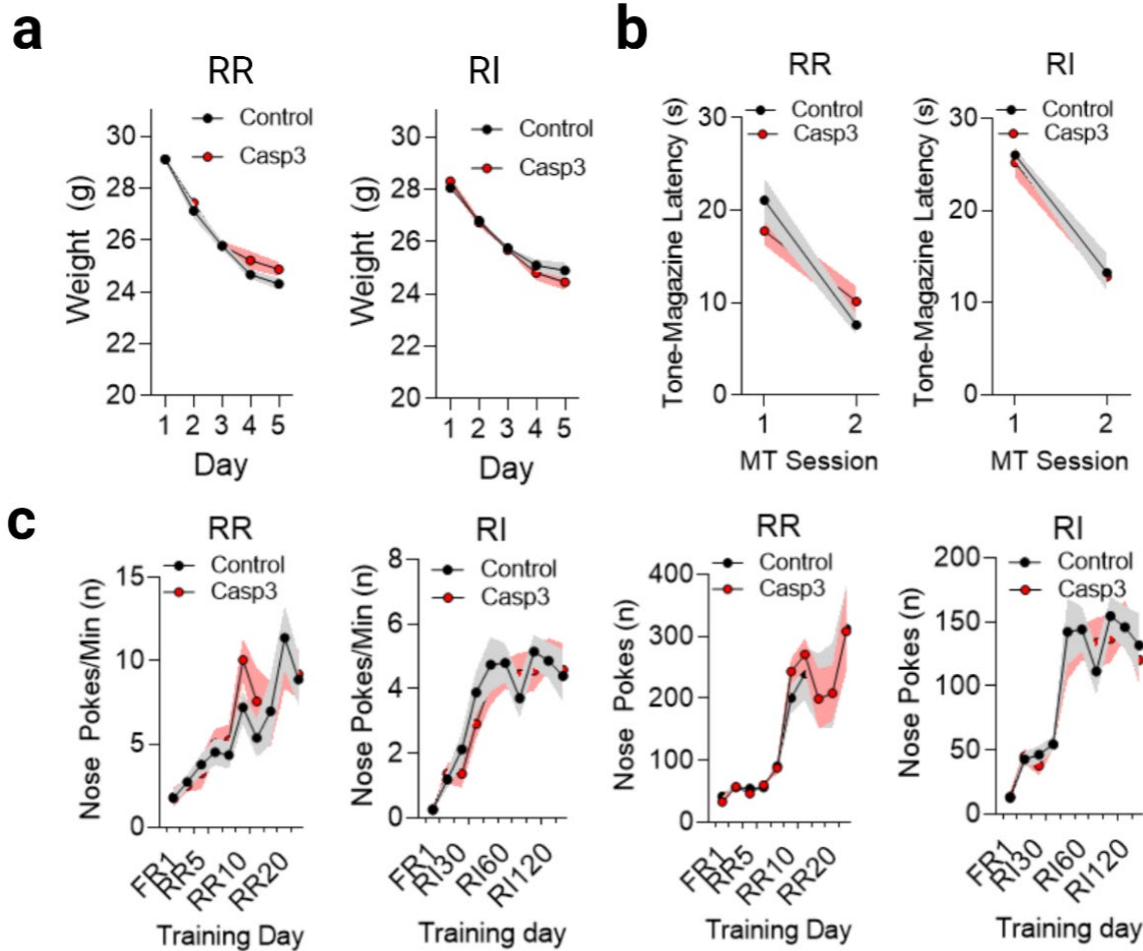

**Supplementary Figure 5. Effects of caspase-3 (casp3) ablation of external globus pallidus (GPe) arypallidal neurons on operant training. (a)** Average weight of mice undergoing food restriction prior to operant conditioning. **(b)** Latency to magazine decreased across training sessions. For RR,  $F_{(1,18)} = 29.91$ ,  $p < 0.0001$  for time,  $F_{(1,18)} = 0.00$ ,  $p = 0.99$  for group,  $F_{(1,18)} = 2.36$ ,  $p = 0.11$  for interaction. For RI,  $F_{(1,18)} = 30.55$ ,  $p < 0.0001$  for time,  $F_{(1,18)} = 0.13$ ,  $p = 0.73$  for group,  $F_{(1,18)} = 0.01$ ,  $p = 0.98$  for interaction. **(c)** Nose poke rates increased over time in the active hole. For RR,  $F_{(9,161)} = 13.38$ ,  $p < 0.0001$  for time,  $F_{(1,18)} = 0.21$ ,  $p = 0.65$  for group,  $F_{(9,161)} = 0.66$ ,  $p = 0.74$  for interaction. For RI,  $F_{(9,161)} = 20.64$ ,  $p < 0.0001$  for time,  $F_{(1,18)} = 0.28$ ,  $p = 0.61$  for group,  $F_{(9,161)} = 0.52$ ,  $p = 0.86$  for interaction. Total nosepokes also increased over time. For RR,  $F_{(9,161)} = 18.29$ ,  $p < 0.0001$  for time,  $F_{(1,18)} = 0.03$ ,  $p = 0.86$  for group,  $F_{(9,161)} = 0.2$ ,  $p = 0.99$  for interaction. For RI,  $F_{(9,161)} = 25.26$ ,  $p < 0.0001$  for time,  $F_{(1,18)} = 0.17$ ,  $p = 0.68$  for group,  $F_{(9,161)} = 0.35$ ,  $p = 0.96$  for interaction. Two-way repeated measures ANOVA tests were used for **(b-c)**.  $n = 10$  mice/group. Total nosepokes across training days. Data represent mean  $\pm$  SEM. See Supplementary Table 2 for full statistical information. Source data are provided as a Source Data file.



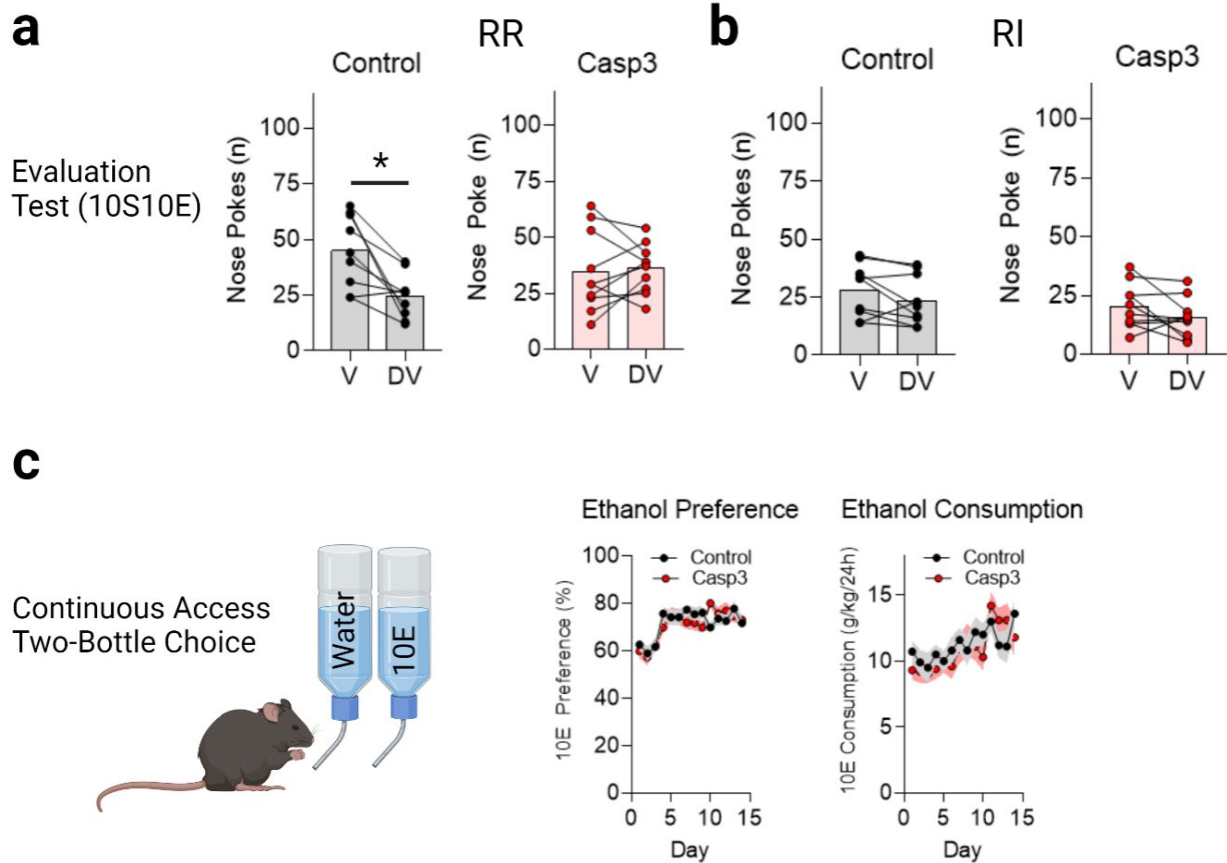

**Supplementary Figure 6. Effect of external globus pallidus (GPe) arypallidal neuron ablation (casp3) on goal-directed and habitual seeking of an ethanol-containing reward and baseline ethanol preference and consumption.** (a) RR-trained (Goal-directed; 10% sucrose 10% ethanol reward) sham mice reduced nosepoke responses in the devalued state, confirming goal directed behavior. However, casp3 mice showed no changes in nose poke responses between valued and devalued states, typical of habitual behavior. (b) RI-trained mice showed no differences between valued and devalued states, suggesting habitual behavior. (c) 10% ethanol preference and consumption during a continuous access two-bottle choice test. For preference,  $F_{(13,234)} = 9.09$ ,  $p < 0.0001$  for time,  $F_{(1,18)} = 0.33$ ,  $p = 0.57$  for group,  $F_{(13,234)} = 1.29$ ,  $p = 0.22$  for interaction. For consumption,  $F_{(13,234)} = 3.54$ ,  $p < 0.0001$  for time,  $F_{(1,18)} = 0.39$ ,  $p = 0.54$  for group,  $F_{(13,234)} = 0.87$ ,  $p = 0.58$  for interaction. Wilcoxon test was used for (a-b). Two-way repeated measures ANOVA tests were used for (c).  $n = 8$  mice/group. Data represent mean  $\pm$  SEM.  $*p < 0.05$ . See Supplementary Table 2 for full statistical information. Source data are provided as a Source Data file. Supplementary Figure 6c was created with BioRender.com.

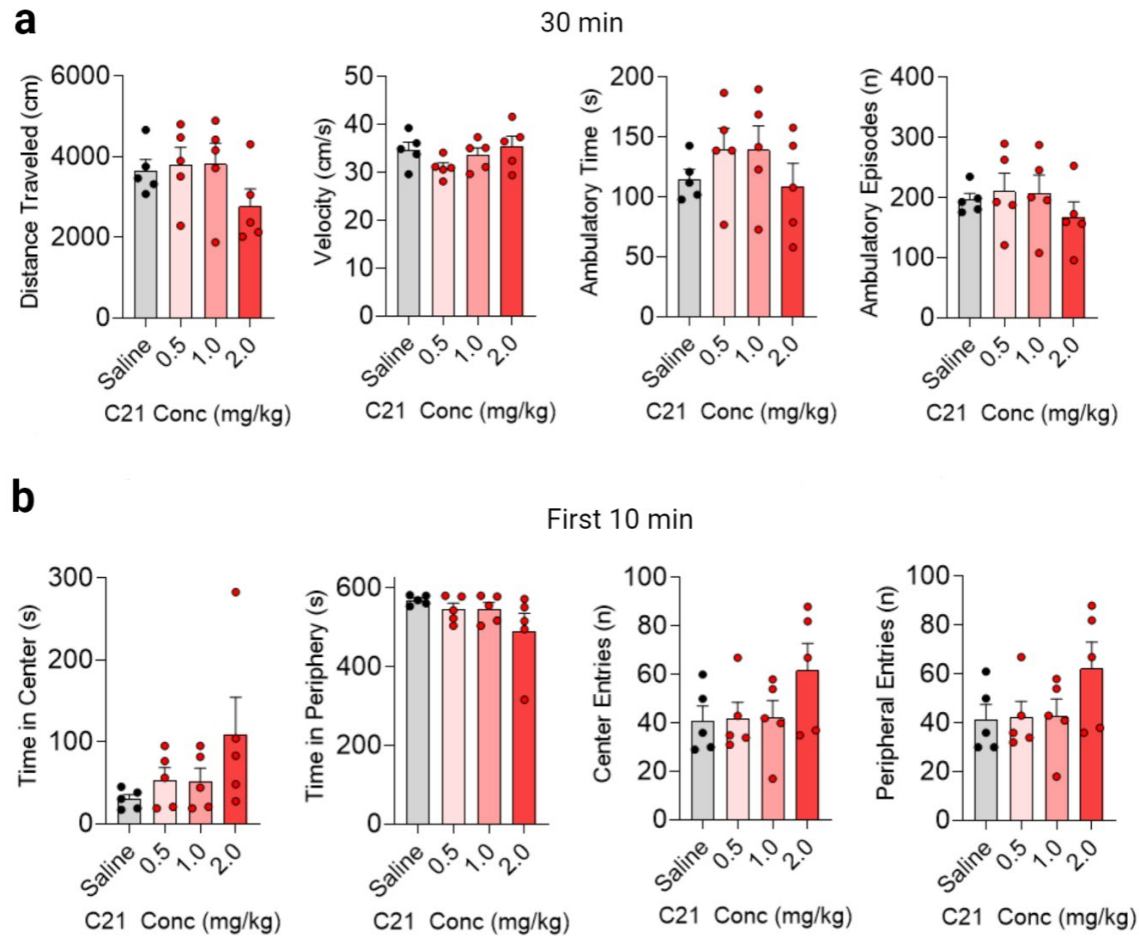

**Supplementary Figure 7. Effects of C21 concentration on spontaneous locomotion in mice expressing hM3Dq in external globus pallidus (GPe) arkypallidal neurons in the open field test. (a)** There was no effect of C21 concentration on distance traveled, average velocity, or ambulatory time and episodes. **(b)** Nor was there any effect on anxiety-like behaviors during the first 10 minutes of the open field test. Kruskal-Wallis tests were used for **(a-b)**.  $n = 5$  mice/group. Data represent mean  $\pm$  SEM. See Supplementary Table 2 for full statistical information. Source data are provided as a Source Data file.



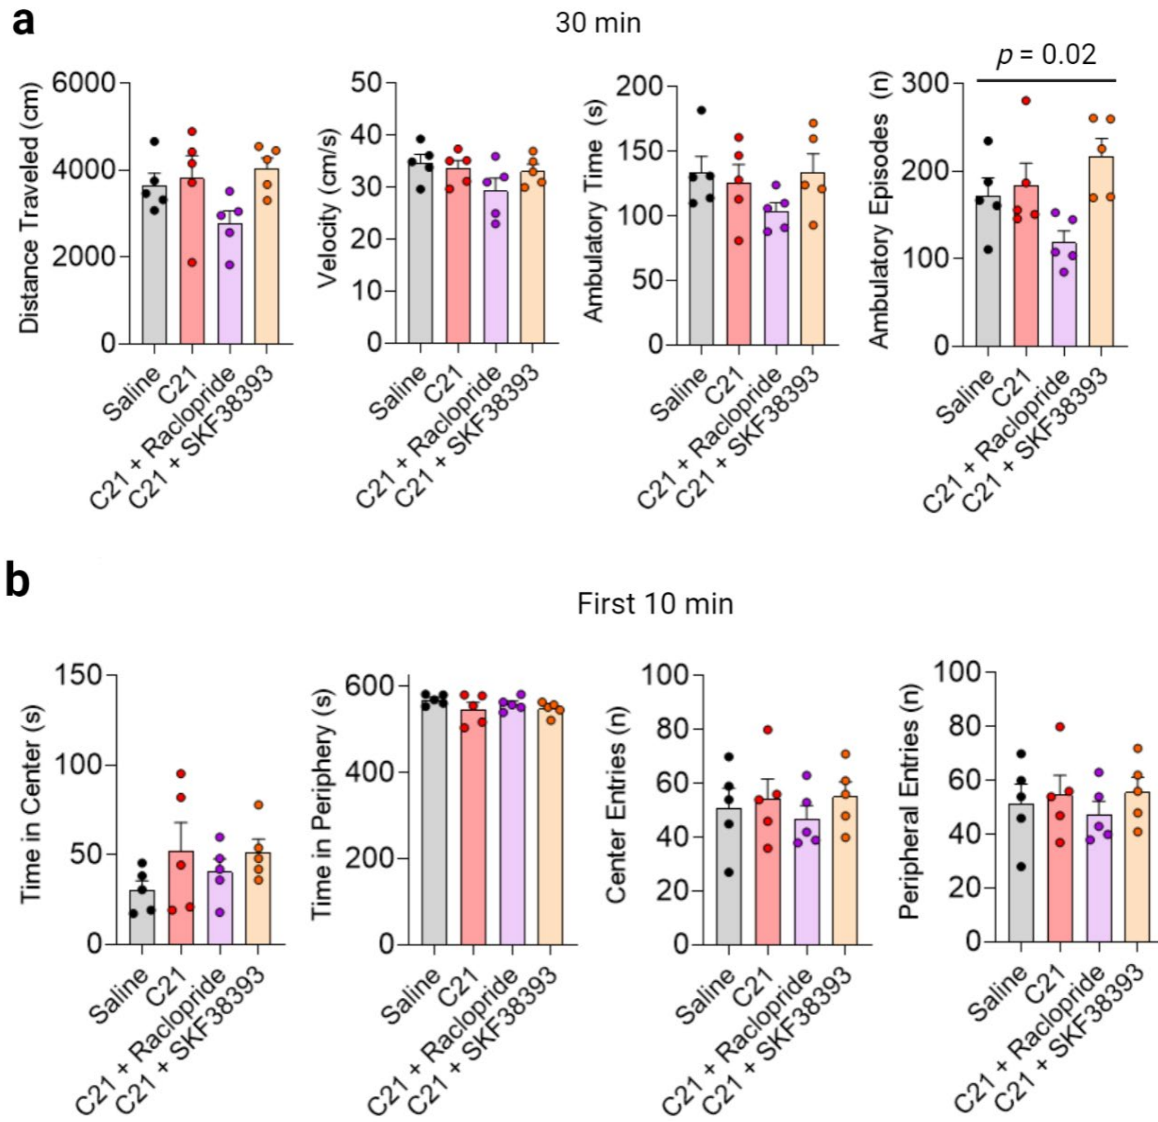

**Supplementary Figure 8. Effects of IP injection groups on spontaneous locomotion in mice expressing hM3Dq in external globus pallidus (GPe) arypallidal neurons in the open field test. (a)** No effects of the injection group on distance traveled, average velocity, or ambulatory time, except the main effect on ambulatory episodes ( $p = 0.02$ ). **(b)** No effects on anxiety-like behaviors during the first 10 minutes of the open field test. Kruskal-Wallis tests were used for **(a-b)**.  $n = 5$  mice/group. Data represent mean  $\pm$  SEM. See Supplementary Table 2 for full statistical information. Source data are provided as a Source Data file.

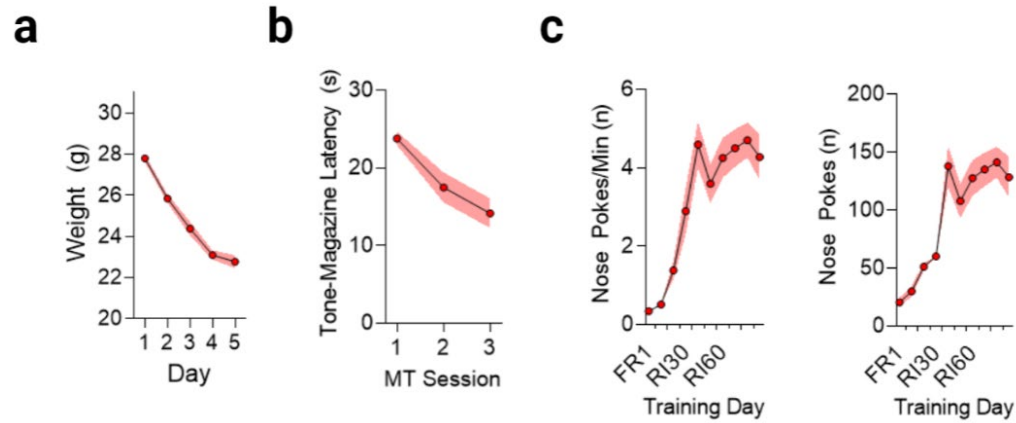

**Supplementary Figure 9. Operant training of hM3Dq-expressing mice in external globus pallidus (GPe) arkyallidal neurons.** (a) Average weight of mice undergoing food restriction prior to operant conditioning. (b) Latency to magazine decreased across training sessions.  $F_{(1,49)} = 17.29$ ,  $p = 0.0001$  for time. (c) Nose poke rates increased over time in the active hole.  $F_{(1,168)} = 91.68$ ,  $p < 0.0001$  for time. Total nosepokes for RI group across the training session.  $F_{(1,168)} = 97.61$ ,  $p < 0.0001$  for time. One-way ANOVA.  $n = 17$  mice. Data represent mean  $\pm$  SEM. See Supplementary Table 2 for full statistical information. Source data are provided as a Source Data file.

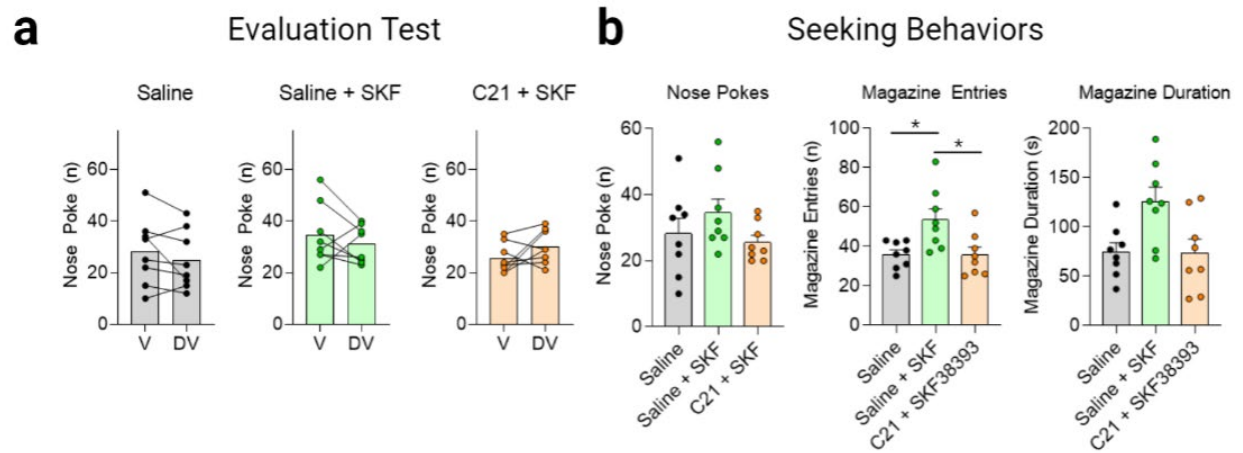

**Supplementary Figure 10. Effect of D1R agonist, SKF38393, on RI operant conditioning. (a)** No differences in nose poke rates between the valued and devalued state for RI-trained mice with saline, saline + SKF, nor C21 + SKF, indicating habitual reward-seeking. **(b)** Systemic D1R activation increased magazine entries compared to saline and coadministration of C21 in mice expressing hM3Dq in GPe arkypallidal neurons. For magazine entry, Dunn's *posthoc* tests show difference between Saline and Saline + SKF ( $p = 0.048$ ), Saline + SKF and C21 + SKF ( $p = 0.034$ ). Wilcoxon test was used for **(a)**. Kruskal-wallis test with Dunn's *posthoc* tests were used for **(b)**.  $n = 8$  mice/group. Data represent mean  $\pm$  SEM.  $*p < 0.05$ . See Supplementary Table 2 for full statistical information. Source data are provided as a Source Data file.

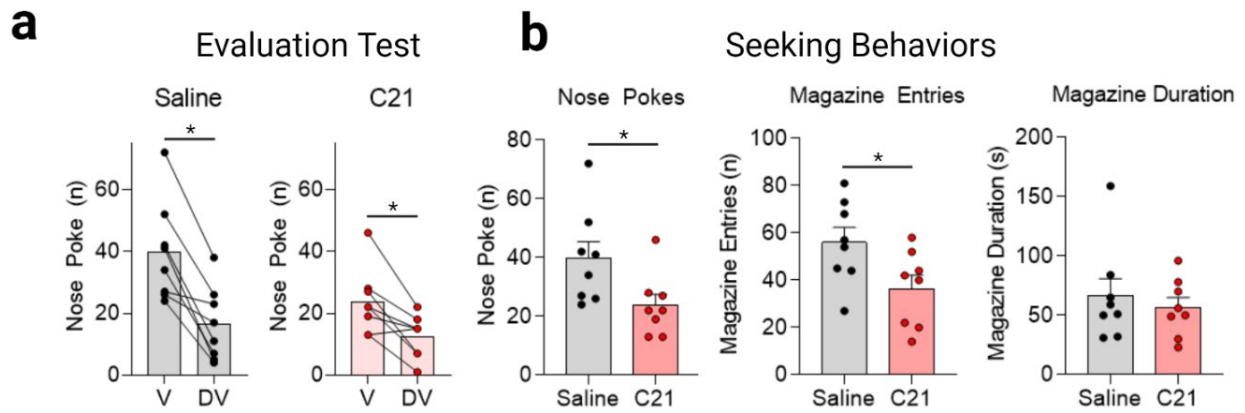

**Supplementary Figure 11. Effect of chemogenetic activation of external globus pallidus (GPe) arypallidal neurons on goal-directed RR conditioning. (a)** Differences between the valued and devalued state for RR-trained mice with saline ( $p = 0.008$ ) and C21 groups ( $p = 0.016$ ), indicating goal-directed reward-seeking. **(b)** Chemogenetic activation of GPe arypallidal neurons decreased nose poke ( $p = 0.03$ ) and magazine entry ( $p = 0.031$ ), but not in magazine duration ( $p = 0.67$ )-seeking behaviors during extinction testing. Wilcoxon test was used for **(a)**. Two-tailed Mann Mann-Whitney tests were used for **(b)**.  $n = 8$  mice/group. Data represent mean  $\pm$  SEM. \* $p < 0.05$ . See Supplementary Table 2 for full statistical information. Source data are provided as a Source Data file.

**a**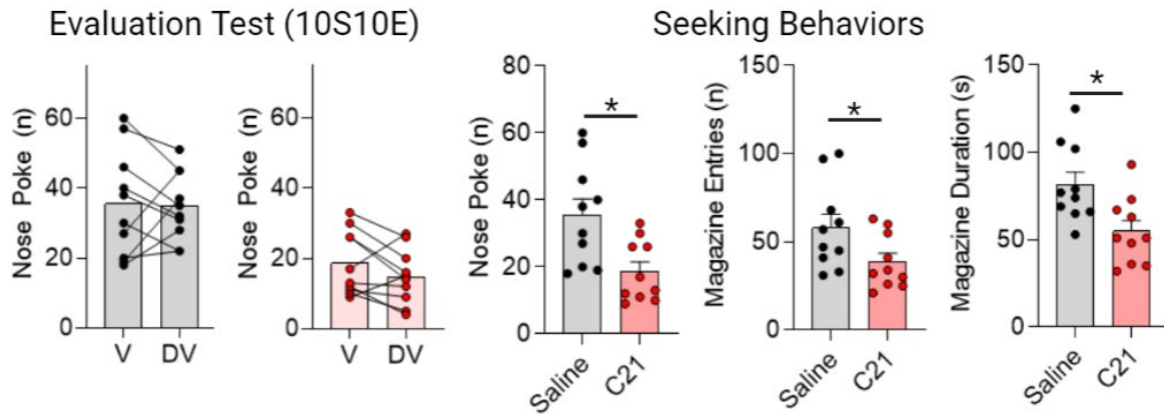

**Supplementary Figure 12. Effect of chemogenetic activation of external globus pallidus (GPe) arypallidal neurons on habitual sweetened ethanol-seeking. (a)** No differences in nosepoke rates between the valued and devalued state for RI-trained mice with saline or C21 groups indicated habitual-seeking. **(b)** Chemogenetic activation of GPe arypallidal neurons decreased nose poke ( $p = 0.0073$ ), magazine entry ( $p = 0.046$ ), and magazine duration ( $p = 0.0065$ )-seeking behaviors during extinction testing. Wilcoxon test was used for **(a)**. Two-tailed Mann Mann-Whitney tests were used for **(b)**.  $n = 10$  mice/group. Data represent mean  $\pm$  SEM.  $*p < 0.05$ . See Supplementary Table 2 for full statistical information. Source data are provided as a Source Data file.

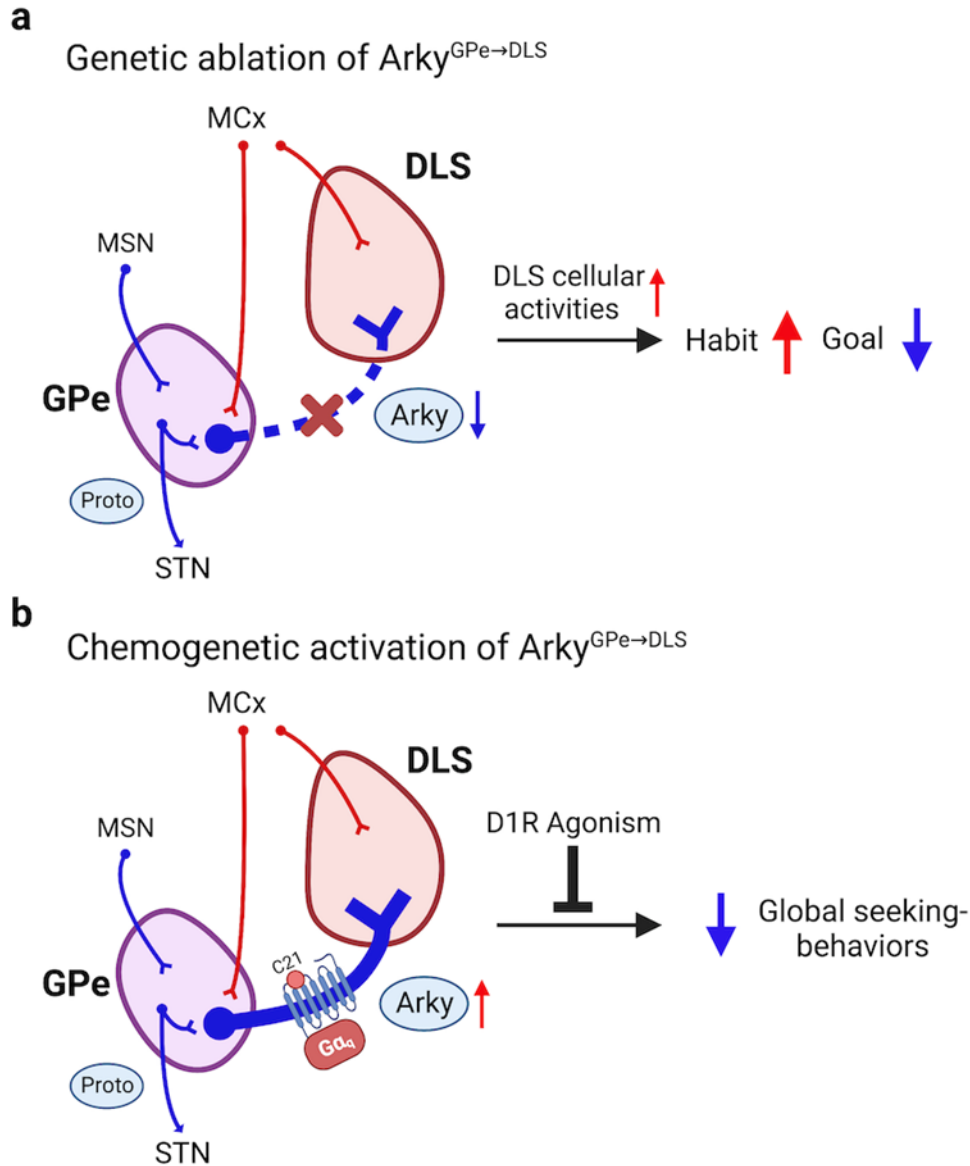

**Supplementary Figure 13. Possible circuit mechanisms of GPe arky pallidal neurons on habitual behaviors.** Circuit overview involving the external globus pallidus (GPe) and dorsolateral striatum (DLS), including excitatory glutamatergic (red) and inhibitory GABAergic (blue) projections. **(a)** Caspase 3-induced ablation of the arky<sup>GPe→DLS</sup> circuit caused an increase in cFos expression in the DLS and resulted in a shift from goal-directed to habitual seeking. **(b)** In contrast, chemogenetic activation (hM3Dq) of arky<sup>GPe→DLS</sup> caused a global reduction in seeking behaviors, which was blocked by D1R agonism. Possible afferent innervation of arky pallidal (arky) neurons from dorsal striatal medium spiny neurons (MSN), motor cortex (MCx), and neighboring prototypic (proto) neurons, which also project to the subthalamic nucleus (STN). Supplementary Figure 13a, and b were created with BioRender.com.



**Supplementary Table 1. SVM AUC results to classify behavioral task types for all time windows of analysis using fiber photometry data.**

| Event          | SVM Data input |         |           |         | AUC          |
|----------------|----------------|---------|-----------|---------|--------------|
|                | Before         |         | After     |         |              |
|                | Start (s)      | End (s) | Start (s) | End (s) |              |
| Nose-poke      | -2             | 0       | 0         | 2       | 0.70 ± 0.001 |
|                | -1.5           | 0       | 0         | 1.5     | 0.68 ± 0.001 |
|                | -1             | 0       | 0         | 1       | 0.65 ± 0.001 |
|                | -0.5           | 0       | 0         | 0.5     | 0.65 ± 0.001 |
| Magazine entry | -2             | 0       | 0         | 2       | 0.66 ± 0.001 |
|                | -1.5           | 0       | 0         | 1.5     | 0.67 ± 0.001 |
|                | -1             | 0       | 0         | 1       | 0.67 ± 0.001 |
|                | -0.5           | 0       | 0         | 0.5     | 0.68 ± 0.001 |
| Magazine exit  | -2             | 0       | 0         | 2       | 0.65 ± 0.001 |
|                | -1.5           | 0       | 0         | 1.5     | 0.68 ± 0.001 |
|                | -1             | 0       | 0         | 1       | 0.70 ± 0.001 |
|                | -0.5           | 0       | 0         | 0.5     | 0.71 ± 0.001 |

**Supplementary Table 2. Summary of statistical analyses and results.**

| Figure    | Statistical Tests | Comparison            | Value                                 | p value               |              |
|-----------|-------------------|-----------------------|---------------------------------------|-----------------------|--------------|
| Figure 1b | One-way ANOVA     | Brain region          | $F_{2,6} = 87.60$                     | $p < 0.0001$          |              |
|           | Tukey's posthoc   | DMS vs DLS            | $q = 18.72$                           | $p = 0.0012$          |              |
| Figure 1d | Unpaired T-test   | DMS vs DLS            | $t(4) = 8.72$                         | $p = 0.001$           |              |
| Figure 2b | Wilcoxon test     | RR: V vs DV           | $W = -21.00$                          | $p = 0.030$           |              |
|           |                   | RI: V vs DV           | $W = -5.00$                           | $p = 0.62$            |              |
| Figure 2g | Two-way ANOVA     | RM                    | NP+: RR vs RI                         | $F_{1,7} = 5.73$      | $p = 0.048$  |
|           |                   |                       | NP+: Time                             | $F_{120,840} = 11.40$ | $p < 0.0001$ |
|           |                   |                       | NP+: Interaction                      | $F_{120,840} = 1.62$  | $p = 0.0001$ |
|           | Two-way ANOVA     | RM                    | NP-: RR vs RI                         | $F_{1,7} = 12.34$     | $p = 0.0098$ |
|           |                   |                       | NP-: Time                             | $F_{120,840} = 12.52$ | $p < 0.0001$ |
|           |                   |                       | NP-: Interaction                      | $F_{120,840} = 5.52$  | $p < 0.0001$ |
| Figure 2h | Two-way ANOVA     | RM                    | ME+: RR vs RI                         | $F_{1,7} = 25.84$     | $p = 0.0014$ |
|           |                   |                       | ME+: Time                             | $F_{120,840} = 14.48$ | $p < 0.0001$ |
|           |                   |                       | ME+: Interaction                      | $F_{120,840} = 5.73$  | $p < 0.0001$ |
|           | Two-way ANOVA     | RM                    | ME -: RR vs RI                        | $F_{1,7} = 0.05$      | $p = 0.83$   |
|           |                   |                       | ME -: Time                            | $F_{120,840} = 5.60$  | $p < 0.0001$ |
|           |                   |                       | ME -: Interaction                     | $F_{120,840} = 1.74$  | $p < 0.0001$ |
| Figure 3b | One-sample test   | t-                    | Accuracy NP vs 50%                    | $t(1599) = 116.1$     | $p < 0.0001$ |
|           | One-sample test   | t-                    | Accuracy $M_{\text{Entry}}$ vs 50%    | $t(1599) = 136.4$     | $p < 0.0001$ |
|           | One-sample test   | t-                    | Accuracy $M_{\text{Exit}}$ vs 50%     | $t(1599) = 105.7$     | $p < 0.0001$ |
|           | One-sample test   | t-                    | Sensitivity NP vs 50%                 | $t(1599) = 109.1$     | $p < 0.0001$ |
|           | One-sample test   | t-                    | Sensitivity $M_{\text{Entry}}$ vs 50% | $t(1599) = 126.9$     | $p < 0.0001$ |
|           | One-sample test   | t-                    | Sensitivity $M_{\text{Exit}}$ vs 50%  | $t(1599) = 101.4$     | $p < 0.0001$ |
|           | One-sample test   | t-                    | Specificity NP vs 50%                 | $t(1599) = 104.8$     | $p < 0.0001$ |
|           | One-sample test   | t-                    | Specificity $M_{\text{Entry}}$ vs 50% | $t(1599) = 118.9$     | $p < 0.0001$ |
|           | One-sample test   | t-                    | Specificity $M_{\text{Exit}}$ vs 50%  | $t(1599) = 94.35$     | $p < 0.0001$ |
| Figure 4c | Unpaired t-test   | Control vs Casp3      | $t(8) = 6.90$                         | $p = 0.001$           |              |
| Figure 4e | Wilcoxon test     | RR Control: V vs DV   | $W = -45.00$                          | $p = 0.0039$          |              |
|           |                   | RR Casp3: V vs DV     | $W = -7.00$                           | $p = 0.73$            |              |
|           | Wilcoxon test     | RI Control: V vs DV   | $W = -16.00$                          | $p = 0.38$            |              |
|           |                   | RI Casp3: V vs DV     | $W = 5.00$                            | $p = 0.83$            |              |
| Figure 4f | Unpaired T-test   | DMS: Control vs Casp3 | $t(8) = 1.02$                         | $p = 0.34$            |              |
|           | Unpaired T-test   | DLS: Control vs Casp3 | $t(8) = 3.99$                         | $p = 0.004$           |              |
| Figure 5e | Paired T-test     | Frequency: Veh vs C21 | $t(3) = 4.47$                         | $p = 0.021$           |              |
|           | Paired T-test     | Time: Veh vs C21      | $t(3) = 11.86$                        | $p = 0.0013$          |              |
| Figure 5f | Wilcoxon test     | Saline: V vs DV       | $W = -58.00$                          | $p = 0.14$            |              |
|           |                   | C21: V vs DV          | $W = -21.00$                          | $p = 0.57$            |              |

|                            |                          |          |                          |                                                           |           |           |
|----------------------------|--------------------------|----------|--------------------------|-----------------------------------------------------------|-----------|-----------|
|                            |                          |          | C21+ Raclopride: V vs DV | W= -2.00                                                  | p= 0.91   |           |
|                            |                          |          | C21+ SKF38393: V vs DV   | W= 0.00                                                   | p= 0.99   |           |
| Figure 5g                  | Kruskal-Wallis test      |          | Nose Poke: Drug          |                                                           | p= 0.0004 |           |
|                            |                          |          | Posthoc Dunn's test      | Saline vs C21                                             | Z = 2.71  | p= 0.04   |
|                            |                          |          |                          | Saline vs C21 + Raclopride                                | Z = 3.96  | p= 0.0005 |
|                            | Saline vs C21 + SKF38393 | Z = 0.83 |                          | p= 0.99                                                   |           |           |
|                            | Kruskal-Wallis test      |          | Magazine Entry: Drug     |                                                           | p< 0.0001 |           |
|                            |                          |          | Posthoc Dunn's test      | Saline vs C21                                             | Z = 3.59  | p= 0.002  |
| Saline vs C21 + Raclopride |                          |          |                          | Z = 4.13                                                  | p= 0.0002 |           |
| Saline vs C21 + SKF38393   | Z = 0.69                 | p= 0.99  |                          |                                                           |           |           |
| Figure S2b                 | Two-way ANOVA            | RM       | MT: Time                 | F <sub>1,16</sub> = 142.9                                 | p<0.0001  |           |
|                            |                          |          | MT: Group                | F <sub>1,16</sub> = 5.34                                  | p= 0.040  |           |
|                            |                          |          | MT: Interaction          | F <sub>1,16</sub> = 1.14                                  | p= 0.30   |           |
| Figure S2c                 | Two-way ANOVA            | RM       | RR: NP                   | F <sub>1,80</sub> = 127.3                                 | p< 0.0001 |           |
|                            |                          |          | RR: Time                 | F <sub>9,80</sub> = 4.99                                  | p< 0.0001 |           |
|                            |                          |          | RR: Interaction          | F <sub>9,80</sub> = 4.93                                  | p< 0.0001 |           |
|                            | Two-way ANOVA            | RM       | RI: NP                   | F <sub>1,80</sub> = 142.1                                 | p< 0.0001 |           |
|                            |                          |          | RI: Time                 | F <sub>9,80</sub> = 1.85                                  | p= 0.070  |           |
|                            |                          |          | RI: Interaction          | F <sub>9,80</sub> = 1.77                                  | p= 0.090  |           |
| Figure S2e                 | Two-way ANOVA            | RM       | MX +: RR vs RI           | F <sub>1,7</sub> = 6.66                                   | p= 0.036  |           |
|                            |                          |          | MX +: Time               | F <sub>120,840</sub> = 0.85                               | p= 0.87   |           |
|                            |                          |          | MX +: Interaction        | F <sub>120,840</sub> = 1.26                               | p= 0.039  |           |
|                            | Two-way ANOVA            | RM       | MX -: RR vs RI           | F <sub>1,7</sub> = 0.20                                   | p= 0.67   |           |
|                            |                          |          | MX -: Time               | F <sub>120,840</sub> = 8.65                               | p< 0.0001 |           |
|                            |                          |          | MX -: Interaction        | F <sub>120,840</sub> = 5.51                               | p< 0.0001 |           |
| Figure S3a                 | Linear Regression        |          | NP+: RR                  | b= 0.065; R <sup>2</sup> = .15; F <sub>1,48</sub> = 8.26  | p= 0.006  |           |
|                            |                          |          | NP+: RI                  | b= 0.10; R <sup>2</sup> = .15; F <sub>1,38</sub> = 6.78   | p= 0.013  |           |
|                            |                          |          | NP+: RR vs RI            | F <sub>1,86</sub> = 0.79                                  | p= 0.38   |           |
| Figure S3b                 | Linear Regression        |          | NP-: RR                  | b= 0.011; R <sup>2</sup> = .03; F <sub>1,48</sub> = 1.48  | p= 0.23   |           |
|                            |                          |          | NP-: RI                  | b= 0.037; R <sup>2</sup> = .23; F <sub>1,38</sub> = 11.66 | p= 0.002  |           |
|                            |                          |          | NP-: RR vs RI            | F <sub>1,86</sub> = 10.08                                 | p= 0.002  |           |
| Figure S3c                 | Linear Regression        |          | ME+: RR                  | b= 0.076; R <sup>2</sup> = .12; F <sub>1,48</sub> = 6.62  | p= 0.013  |           |
|                            |                          |          | ME+: RI                  | b= 0.18; R <sup>2</sup> = .43; F <sub>1,38</sub> = 28.86  | p< 0.0001 |           |
|                            |                          |          | ME+: RR vs RI            | F <sub>1,86</sub> = 5.34                                  | p= 0.023  |           |
| Figure S3d                 | Linear Regression        |          | ME-: RR                  | b= 0.044; R <sup>2</sup> = .04; F <sub>1,48</sub> = 1.96  | p= 0.17   |           |
|                            |                          |          | ME-: RI                  | b= 0.080; R <sup>2</sup> = .19; F <sub>1,38</sub> = 9.08  | p= 0.005  |           |
|                            |                          |          | ME-: RR vs RI            | F <sub>1,86</sub> = 0.69                                  | p= 0.41   |           |
| Figure S3e                 |                          |          | MX+: RR                  | b= -0.08; R <sup>2</sup> = .16; F <sub>1,48</sub> = 9.08  | p= 0.004  |           |

|            |                    |                                       |                                                              |           |
|------------|--------------------|---------------------------------------|--------------------------------------------------------------|-----------|
|            | Linear Regression  | MX+: RI                               | b= -0.05; R <sup>2</sup> = .08;<br>F <sub>1,38</sub> = 3.12  | p= 0.09   |
|            |                    | MX+: RR vs RI                         | F <sub>1,86</sub> = 0.60                                     | p= 0.44   |
| Figure S3f | Linear Regression  | MX-: RR                               | b= -0.06; R <sup>2</sup> = .06;<br>F <sub>1,48</sub> = 3.30  | p= 0.075  |
|            |                    | MX-: RI                               | b= -0.12; R <sup>2</sup> = .36;<br>F <sub>1,38</sub> = 21.77 | p< 0.0001 |
|            |                    | MX-: RR vs RI                         | F <sub>1,86</sub> = 2.29                                     | p= 0.13   |
| Figure S4a | Mann-Whitney test  | Distance: Control vs Casp3            | U = 81                                                       | p= 0.45   |
|            |                    | Velocity: Control vs Casp3            | U = 91                                                       | p= 0.76   |
|            |                    | Ambulatory Time: Control vs Casp3     | U = 58                                                       | p= 0.069  |
|            |                    | Ambulatory Episodes: Control vs Casp3 | U = 97                                                       | p= 0.98   |
| Figure S4b | Mann-Whitney test  | Time in center: Control vs Casp3      | U = 70                                                       | p= 0.21   |
|            |                    | Time in periphery: Control vs Casp3   | U = 70                                                       | p= 0.21   |
|            |                    | Center Entries: Control vs Casp3      | U = 80                                                       | p= 0.42   |
|            |                    | Peripheral Entries: Control vs Casp3  | U = 80                                                       | p= 0.42   |
| Figure S4c | Two-Way ANOVA RM   | Time                                  | F <sub>49,1274</sub> = 8.68                                  | p< 0.0001 |
|            |                    | Control vs Casp                       | F <sub>1,26</sub> = 1.28                                     | p= 0.27   |
|            |                    | Interaction                           | F <sub>49,1274</sub> = 0.76                                  | p= 0.89   |
| Figure S4d | Two-Way ANOVA RM   | Time                                  | F <sub>4,130</sub> = 58.82                                   | p< 0.0001 |
|            |                    | Control vs Casp                       | F <sub>1,130</sub> = 1.49                                    | p= 0.22   |
|            |                    | Interaction                           | F <sub>4,130</sub> = 2.99                                    | p= 0.018  |
|            | Posthoc test Sidak | Day 1                                 | t(130) = 3.90                                                | p= 0.0005 |
|            |                    | Day 2                                 | t(130) = 2.92                                                | p= 0.018  |
|            |                    | Day 3                                 | t(130) = 1.11                                                | p= 0.79   |
|            |                    | Day 4                                 | t(130) = 0.56                                                | p= 0.98   |
| Day 5      | t(130) = 1.25      | p= 0.69                               |                                                              |           |
| Figure S5b | Two-way ANOVA RM   | RR MT: Time                           | F <sub>1,18</sub> = 29.91                                    | p< 0.0001 |
|            |                    | RR MT: Group                          | F <sub>1,18</sub> = 0.00                                     | p= 0.99   |
|            |                    | RR MT: Interaction                    | F <sub>1,18</sub> = 2.36                                     | p= 0.11   |
|            | Two-way ANOVA RM   | RI MT: Time                           | F <sub>1,18</sub> = 30.55                                    | p< 0.0001 |
|            |                    | RI MT: Group                          | F <sub>1,18</sub> = 0.13                                     | p= 0.73   |
|            |                    | RI MT: Interaction                    | F <sub>1,18</sub> = 0.01                                     | p= 0.98   |
| Figure S5c | Two-way ANOVA RM   | RR: Time                              | F <sub>9,161</sub> = 13.38                                   | p< 0.0001 |
|            |                    | RR: Group                             | F <sub>1,18</sub> = 0.21                                     | p= 0.65   |
|            |                    | RR: Interaction                       | F <sub>9,161</sub> = 0.66                                    | p= 0.74   |
|            | Two-way ANOVA RM   | RI: Time                              | F <sub>9,161</sub> = 20.64                                   | p< 0.0001 |
|            |                    | RI: Group                             | F <sub>1,18</sub> = 0.28                                     | p= 0.61   |
|            |                    | RI: Interaction                       | F <sub>9,161</sub> = 0.52                                    | p= 0.86   |
|            | Two-way ANOVA RM   | RR: Time                              | F <sub>9,161</sub> = 18.29                                   | p< 0.0001 |
|            |                    | RR: Group                             | F <sub>1,18</sub> = 0.03                                     | p= 0.86   |
|            |                    | RR: Interaction                       | F <sub>9,161</sub> = 0.2                                     | p= 0.99   |
|            | Two-way ANOVA RM   | RI: Time                              | F <sub>9,161</sub> = 25.26                                   | p< 0.0001 |
|            |                    | RI: Group                             | F <sub>1,18</sub> = 0.17                                     | p= 0.68   |

|            |                                |                                         |                     |              |
|------------|--------------------------------|-----------------------------------------|---------------------|--------------|
|            |                                | RI: Interaction                         | $F_{9,161} = 0.35$  | $p = 0.96$   |
| Figure S6a | Wilcoxon test                  | RR Control: V vs DV                     | $W = -43.00$        | $p = 0.0078$ |
|            |                                | RR Casp3: V vs DV                       | $W = 8.00$          | $p = 0.72$   |
| Figure S6b | Wilcoxon test                  | RI Control: V vs DV                     | $W = -28.00$        | $p = 0.11$   |
|            |                                | RI Casp3: V vs DV                       | $W = -29.00$        | $p = 0.15$   |
| Figure S6c | Two-Way RM ANOVA (preference)  | Time                                    | $F_{13,234} = 9.09$ | $p < 0.0001$ |
|            |                                | Control vs Casp3                        | $F_{1,18} = 0.33$   | $p = 0.57$   |
|            |                                | Interaction                             | $F_{13,234} = 1.29$ | $p = 0.22$   |
|            | Two-Way RM ANOVA (consumption) | Time                                    | $F_{13,234} = 3.54$ | $p < 0.0001$ |
|            |                                | Control vs Casp3                        | $F_{1,18} = 0.39$   | $p = 0.54$   |
|            |                                | Interaction                             | $F_{13,234} = 0.87$ | $p = 0.58$   |
| Figure S7a | Kruskal-Wallis test            | Distance traveled: C21 concentration    |                     | $p = 0.28$   |
|            |                                | Velocity: C21 concentration             |                     | $p = 0.29$   |
|            |                                | Ambulatory time: C21 concentration      |                     | $p = 0.56$   |
|            |                                | Ambulatory episode: C21 concentration   |                     | $p = 0.37$   |
| Figure S7b | Kruskal-Wallis test            | Time in center: C21 concentration       |                     | $p = 0.17$   |
|            |                                | Time in periphery: C21 concentration    |                     | $p = 0.17$   |
|            |                                | Center entries: C21 concentration       |                     | $p = 0.37$   |
|            |                                | Peripheral entries: C21 concentration   |                     | $p = 0.34$   |
| Figure S8a | Kruskal-Wallis test            | Distance traveled: IP injection groups  |                     | $p = 0.07$   |
|            |                                | Velocity: IP injection groups           |                     | $p = 0.42$   |
|            |                                | Ambulatory time: IP injection groups    |                     | $p = 0.19$   |
|            |                                | Ambulatory episode: IP injection groups |                     | $p = 0.02$   |
|            | Posthoc Dunn's test            | Saline vs C21                           | $Z = 0.05$          | $p > 0.99$   |
|            |                                | Saline vs C21 + Raclopride              | $Z = 2.03$          | $p = 0.13$   |
|            |                                | Saline vs C21 + SKF38393                | $Z = 0.79$          | $p = 0.79$   |
| Figure S8b | Kruskal-Wallis test            | Time in center: IP injection groups     |                     | $p = 0.30$   |
|            |                                | Time in periphery: IP injection groups  |                     | $p = 0.30$   |
|            |                                | Center entries: IP injection groups     |                     | $p = 0.68$   |
|            |                                | Peripheral entries: IP injection groups |                     | $p = 0.71$   |
| Figure S9b | One-way RM ANOVA               | MT Time                                 | $F_{1,49} = 17.29$  | $p = 0.0001$ |
| Figure S9c | One-way RM ANOVA               | NP rate: RI Time                        | $F_{1,168} = 91.68$ | $p < 0.0001$ |

|             |                     |                         |                     |              |
|-------------|---------------------|-------------------------|---------------------|--------------|
|             | One-way RM ANOVA    | Total NP: RI Time       | $F_{1,168} = 97.61$ | $p < 0.0001$ |
| Figure S10a | Wilcoxon test       | Saline: V vs DV         | $W = -14.00$        | $p = 0.36$   |
|             |                     | SKF: V vs DV            | $W = -14.00$        | $p = 0.37$   |
|             |                     | SKF+C21: V vs DV        | $W = 19.00$         | $p = 0.20$   |
| Figure S10b | Kruskal-Wallis test | Nose Poke: Drug         |                     | $p = 0.26$   |
|             |                     | Magazine Entry: Drug    |                     | $p = 0.02$   |
|             | Posthoc Dunn's test | Saline vs SKF           | $Z = 2.41$          | $p = 0.048$  |
|             |                     | Saline vs C21 + SKF     | $Z = 0.12$          | $p > 0.99$   |
|             |                     | SKF vs C21 + SKF        | $Z = 2.53$          | $p = 0.034$  |
|             | Kruskal-Wallis test | Magazine Duration: Drug |                     | $p = 0.043$  |
|             |                     | Posthoc Dunn's test     | Saline vs SKF       | $Z = 2.19$   |
|             | Saline vs C21 + SKF |                         | $Z = 0.04$          | $p > 0.99$   |
|             | SKF vs C21 + SKF    |                         | $Z = 2.16$          | $p = 0.093$  |
| Figure S11a | Wilcoxon test       | Saline: V vs DV         | $W = -36.00$        | $p = 0.008$  |
|             |                     | C21: V vs DV            | $W = -34.00$        | $p = 0.016$  |
| Figure S11b | Mann-Whitney test   | NP: Saline vs C21       | $U = 11.50$         | $p = 0.03$   |
|             |                     | Entries: Saline vs C21  | $U = 11.50$         | $p = 0.031$  |
|             |                     | Duration: Saline vs C21 | $U = 27.50$         | $p = 0.67$   |
| Figure S12a | Wilcoxon test       | Saline: V vs DV         | $W = -3.00$         | $p = 0.90$   |
|             |                     | C21: V vs DV            | $W = -31.00$        | $p = 0.13$   |
| Figure S12b | Mann-Whitney test   | NP: Saline vs C21       | $U = 15.5$          | $p = 0.0073$ |
|             |                     | Entries: Saline vs C21  | $U = 23.5$          | $p = 0.046$  |
|             |                     | Duration: Saline vs C21 | $U = 15$            | $p = 0.0065$ |



**Supplementary Table 3. Time range for significant (*posthoc* Sidak test;  $p < 0.05$ ) individual comparisons between fiber photometry groups.**

| <b>Figure</b> | <b>Comparison</b>               | <b>Time range</b> |
|---------------|---------------------------------|-------------------|
| Fig. 2g       | NP+; RR vs. RI                  | NS                |
|               | NP-; RR vs. RI                  | 0.73 – 1.7 s      |
| Fig. 2h       | M <sub>entry</sub> +; RR vs. RI | 0.00 – 2 s        |
|               | M <sub>entry</sub> -; RR vs. RI | NS                |
| Fig. S2e      | M <sub>exit</sub> +; RR vs. RI  | NS                |
|               | M <sub>exit</sub> -; RR vs. RI  | 0.03 – 0.27 s     |
